# Supplementary material for: Pb2BO3Br: a novel nonlinear optical lead borate bromine with a KBBF-type structure exhibiting strong nonlinear optical response
Source: Royal Society of Chemistry journal article supplement (doi:10.1039/c8qi00026c), 2018-01-01
Supplement: c8qi00026c1.pdf [file c8qi00026c1.pdf]

## Electronic Supplementary Information

Min Luo<sup>\*,a</sup>, Yunxia Song<sup>a,b</sup>, Fei Liang<sup>b,c</sup>, Ning Ye<sup>\*,a</sup>, and Zheshuai Lin<sup>c</sup>

*a. Key Laboratory of Optoelectronic Materials Chemistry and Physics, Fujian Institute of Research on the Structure of Matter, Chinese Academy of Sciences, Fuzhou, Fujian, 350002, P. R. China*

*b. University of Chinese Academy of Sciences, Beijing 100049, P. R. China*

*c. Center for Crystal Research and Development, Technical Institute of Physics and Chemistry, Chinese Academy of Sciences, Beijing, 100190, China.*

Email: [lm8901@fjirsm.ac.cn](mailto:lm8901@fjirsm.ac.cn)  
[nye@fjirsm.ac.cn](mailto:nye@fjirsm.ac.cn)

Table S1. Atomic coordinates and equivalent isotropic displacement parameters for  $\text{Pb}_2\text{BO}_3\text{Br}$

| atom  | x        | y        | z       | U(eq)  |
|-------|----------|----------|---------|--------|
| Pb(1) | 3333     | 6667     | 2121(3) | 13(1)  |
| Br(1) | 0        | 0        | 5000    | 30(2)  |
| O(1)  | 2640(80) | 2640(80) | 0       | 32(11) |
| B(1)  | 0        | 10000    | 0       | 0(10)  |

Table S2. Bond lengths ( $\text{\AA}$ ) for  $\text{Pb}_2\text{BO}_3\text{Br}$

|                   |         |                     |             |
|-------------------|---------|---------------------|-------------|
| Pb(1)-O(1)#1      | 2.34(2) | O(1)#1-Pb(1)-O(1)#2 | 86.6(5)     |
| Pb(1)-O(1)        | 2.34(2) | O(1)-Pb(1)-O(1)#2   | 86.6(6)     |
| Pb(1)-O(1)#2      | 2.34(2) | B(1)#3-O(1)-Pb(1)   | 120.1(8)    |
| O(1)-B(1)#3       | 1.31(4) | B(1)#3-O(1)-Pb(1)#4 | 120.1(8)    |
| O(1)-Pb(1)#4      | 2.34(2) | Pb(1)-O(1)-Pb(1)#4  | 119.8(17)   |
| B(1)-O(1)#5       | 1.31(4) | O(1)#5-B(1)-O(1)#1  | 120.000(11) |
| B(1)-O(1)#1       | 1.31(4) | O(1)#5-B(1)-O(1)#6  | 120.000(1)  |
| B(1)-O(1)#6       | 1.31(4) | O(1)#1-B(1)-O(1)#6  | 120.000(17) |
| O(1)#1-Pb(1)-O(1) | 86.6(6) |                     |             |

Symmetry transformations used to generate equivalent atoms:

#1  $-x+y, -x+1, z$  #2  $-y+1, x-y+1, z$  #3  $x, y-1, z$

#4  $y, x,-z$  #5  $x, y+1, z$  #6  $-y, x-y+1, z$

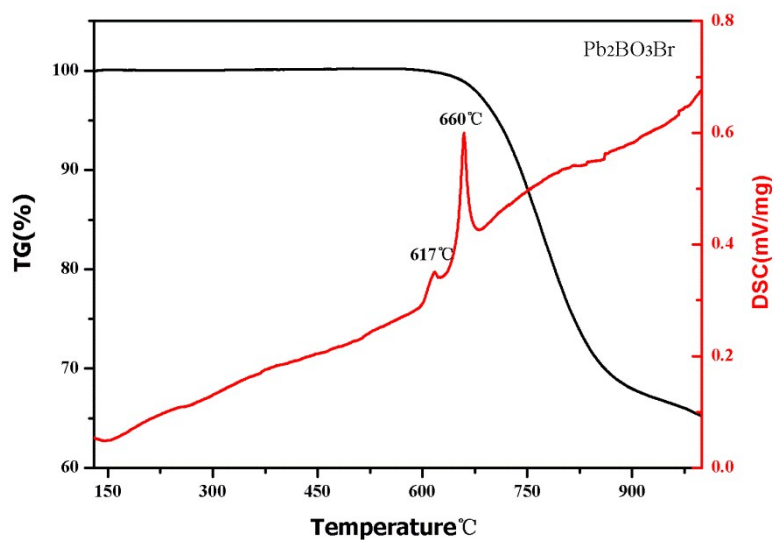

Fig.S1. TG and DSC curves of  $\text{Pb}_2\text{BO}_3\text{Br}$

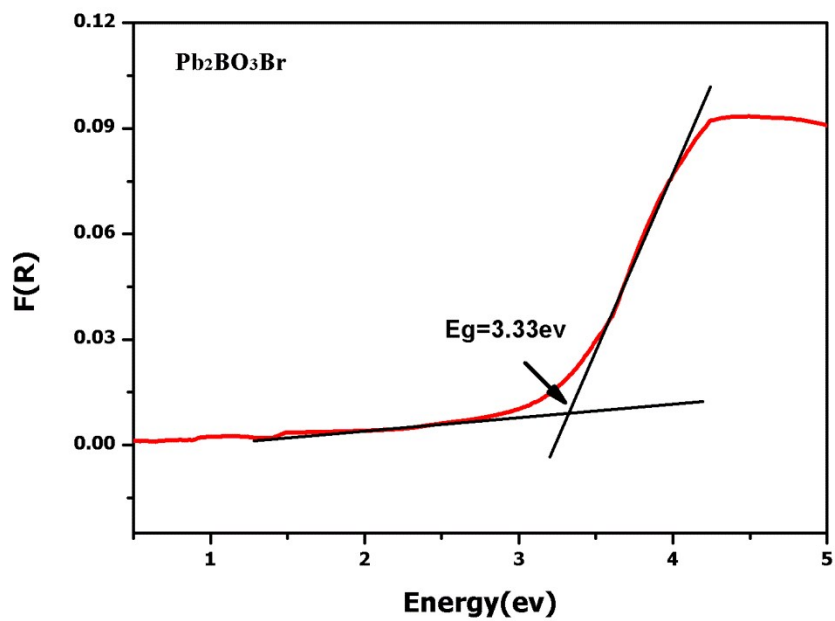

Fig. S2 Optical diffuse reflectance spectra for  $\text{Pb}_2\text{BO}_3\text{Br}$
